# Supplementary material
Source: Springer Nature journal article supplement (https://www.springermedizin.de/resource/supplementary/12993_2011_382_MOESM1_ESM.pdf/9617690)

A.

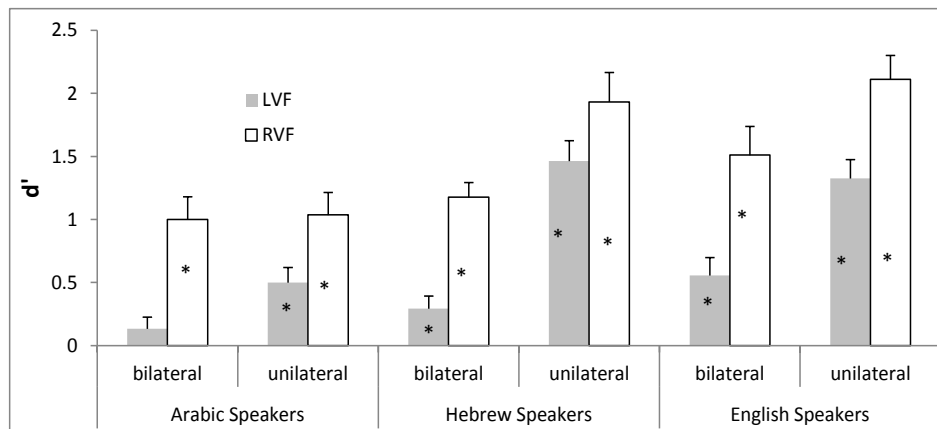

B.

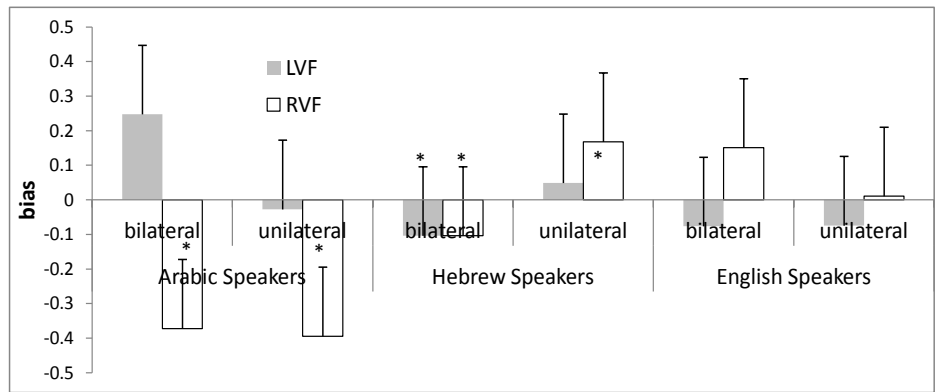

Supplement: MOESM1 [file 9617690]
